# Supplementary material for: Culturally Congruent Intensive Case Management Service for Three Refugee Communities
Source: Atypon-hosted journal article supplement (doi:10.1176/appi.ps.201800082), 2018-10-01
Supplement: appi.ps.201800082.ds001.pdf [file appi.ps.201800082.ds001.pdf]

Online Supplement Table 1. Client demographic and diagnostic information at baseline (N=90)

|                                            | <i>N</i>      | %  |
|--------------------------------------------|---------------|----|
| Age in years (M±SD)                        | 40.88 (10.36) |    |
| Gender                                     |               |    |
| Male                                       | 28            | 31 |
| Female                                     | 62            | 69 |
| Primary language                           |               |    |
| Tamil                                      | 32            | 36 |
| Dari                                       | 19            | 21 |
| Pashtu                                     | 5             | 6  |
| Somali                                     | 6             | 7  |
| English                                    | 10            | 11 |
| Other                                      | 18            | 20 |
| Primary diagnosis                          |               |    |
| Mood disorders                             | 47            | 52 |
| Schizophrenia or other psychotic disorders | 42            | 47 |
| Personality disorders                      | 1             | 1  |

Online Supplement Table 2. Baseline and 2-year post-admission clinical data of clients who had stayed in the program for 2 or more years (N = 58)

|                                  | Baseline |           | 2-year Follow-Up |           | <i>t</i> | Effect Size |
|----------------------------------|----------|-----------|------------------|-----------|----------|-------------|
|                                  | <i>M</i> | <i>SD</i> | <i>M</i>         | <i>SD</i> |          |             |
| Hospital days <sup>a</sup>       | 0.09     | 0.46      | 0.07             | 0.28      | -0.27    | -0.05       |
| Hospital visits <sup>b</sup>     | 2.14     | 3.86      | 0.02             | 0.05      | -3.60*** | -0.77       |
| Treatment adherence <sup>c</sup> | 0.93     | 0.13      | 0.98             | 0.06      | 2.46*    | 0.49        |
| Employment status <sup>d</sup>   | 1.28     | 0.49      | 1.69             | 0.90      | 3.07**   | 0.57        |

\* $p < .05$ ; \*\* $p < .01$ ; \*\*\* $p < .001$  (2 tailed)

<sup>a</sup>Baseline value is average number of hospital days from the first 6 months (month 1–month 6) in the Program and the 2-year follow-up value is the average value from the last 6 months (month 19–month 24) in the 2-year service period.

<sup>b</sup>Baseline value is the average number of psychiatric visits in the year prior to admission to the Program (based on the client’s hospital admission or discharge reports as well as the referral forms) and the 2-year follow-up value is the average number of psychiatric visits of the last 6 months in the 2-year service period.

<sup>c</sup>Coded as “0=not adherent”, “1 = adherent”. Baseline value is average value from the first 6 months (month 1–month 6) in the Program and the 2-year follow-up value is the average value from the last 6 months (month 19–month 24) in the 2-year service period.

<sup>d</sup>Coded as “1 = no employment or other related activity of any kind”, “2 = no employment but other related activity (e.g. employment training)”, and “3 = employment all types”. Baseline value is the average value of client’s employment status in the year prior to admission to the program (based on the

client's hospital admission or discharge reports as well as the referral forms) and the 2-year follow-up value is the average value of the last 6 months in the 2-year service period.
